# Supplementary material
Source: Research Square preprint supplement (doi:10.21203/rs.3.rs-8943594/v1)
Supplement: Supplementary file 2 [file 6b921e4b8e7948a60d631b7b.docx]

**Supplementary Note 1 Count distribution of variant between groups**

We used Fisher's exact test to observe the count distribution of variant between groups (Figure 2c, Table S6). As results, only LofC group reached the threshold of p<0.05, for Schizophrenia group vs. Obsessive-complusive disorder (S *vs.* O), odds ratio (OR)=1.37, p=0.0079; for Schizophrenia group vs. Control (S VS N), OR=1.22, p=0.046. With regards to MisA, the comparison of MisA between Schizophrenia and Control groups (S *vs.* N) reached marginal significance (OR= 1.07, p=0.069).

**Supplementary Note 2 Burden test using Roadmap annotation within specific panels**

In order to limit the noise in unrelated genome regions, we focus on comparison within the co-segregation panel in non-coding region (CSncs) (see Methods). The results showed that variants were enriched in “Strong transcription (4_Tx)” (p=0.0043, OR=1.144, q=0.196), “flanking bivalent TSS/Enh (11_BivFlnk)” (p=0.032, OR=1.615,q=0.476) regions in OCD compared to control(Figure 2c, Table S9). Conversely, the control group exhibited a higher burden of “15_Quies” element than OCD (p=0.046, OR=0.971, q=0.476). No significant differences were observed between SCZ and control (Figure 2c, Table S9). Among the results from the Roadmap model, only Strong transcription state between OCD and control reach the threshold of q<0.2.

Similar results were also observed within the non-coding OCD-specific panels (OSncs) and SCZ-specific panels (SSncs) in corresponding comparisons in our datasets (Figure 2d-e, Table S10-11). For example, in the OSncs gene panel, OCD was enriched in multiple transcription-active-related states compared to control (1_TssA: OR=1.346, p=4.68e-5, q=0.0003; 4_Tx: OR=1.408, p=4.22e-5, q=0.0003; 5_TxWk: OR=1.191, p=0.0006, q= 0.003), while the control had a more significant distribution in the quiescent state (Quies) (OR=0.729, p=5.9e-13, q=1.33e-11) (Figure 2d, Table S10). In the SSncs panel, compared to the control, the SCZ had a more significant distribution in the transcriptionally active associated state (1_TssA: OR=1.421, p=3.05e-7, q=4.57e-6; 4_Tx : OR=1.185, p=0.025, q=0.143) as well as enriched in enhancers (7_Enh: OR=1.415, p=0.002, q=0.016), while the control had a more significant distribution in the quiescent state (Quies) (OR=0.798, p=3.10e-8, q=6.97e-7) (Figure 2e, Table S11).

The predictive annotation results based on the Refseq functional region annotation, Sei model and experimental data from PsychEncode roughly converge with Roadmap (Figure S5a-d, Table S8-11).

**Supplementary Note 3 Variant impact on protein-protein interaction**

We use MIPPI[23] to evaluate whether or not the effect of high-impact variant on protein-protein interaction (PPI) differed among groups (see Methods). The results showed that both SCZ-specific and OCD-specific variants showed a lower proportion in “no effect” class compared to control-specific variants (SCZset *vs.* CTset OR=1.34, p=3.46e-22, q=3.04e-7; OCDset VS CTset OR=1.30, p=4.11e-6, q=1.54e-15, Figure 5a, Table S14). No significant differences were observed in “no effect” class of the SCZ and OCD groups. These results suggested a potential larger-scale PPI network disturbance in the etiology in OCD and SCZ groups compared with control.

**Supplementary Note 4 Enrichment of high-impact variants in different groups**

HI_SScds genes were specifically enriched in “calcium ion transport” (p=0.0002, q=0.032), “behavior” (p=6.28e-9, q=5.01e-5), “cellular anatomical entity morphogenesis” (p=1.56e-8, q=6.31e-5), while HI_OScds genes were primarily enriched in “cell junction organization” (p=9.43e-9, q=5.01e-5) (Figure 5c, Table S15). Over representation analysis revealed that only HI_OScds, genes were enriched in FMRP-target genes (p=0.0001, q=0.001), RBFOX-target genes (p=0.001, q=0.004) and NDD genes (p=0.046, q=0.139) (Table S16).

**Supplementary Note 5 Analysis and enrichment details of different disease modules**

Dividing the developmental stages according to pregnancy stage (see Methods), we assumed that only the time of higher-than-average expression peak may relate to the periods these modules were in high sensitivity to risk variants. Modules with coding genesets enriched, including SCZ.greenyellow (n=43, p=1.98e-7) and SCZ.black (n=69, p=0.00094) modules, and OCD.green module (n=116, p=5.7e-7), tended to express after late-pregnancy (Figure 6a-c). Within non-coding genesets, active-transcription-hit genes tended to enriched in modules highly expressed in mid-pregnancy (Table S20-21), including SCZ.green (p=3.20e-5) and SCZ.blue (p=2.38e-9) modules, as well as OCD.blue (p=5.91e-7) and OCD.black (p=0.00012) modules (Figure 6a-b). Taking enriched celltype into consideration (Figure 6c), only modules highly express after late-pregnancy manifested significant enrichment in celltype after FDR correction, including the SCZ.greenyellow and SCZ.black modules (Figure 6c), OCD.green modules, as well as the OCD.brown module and SCZ.brown module (Figure 6c, Table S20-S23).

Paired analyses between groups revealed the genetic convergence of diseases identified by the overlap of coding variants. According to EWCE, OCD.green was associated with celltypes including astrocytes (Astro, Fold change=2.42, p<0.0001, q<0.0001), endothelial cells (Endo, Fold change=2.42, p<0.0001, q<0.0001), vascular smooth muscle cells (SMC, Fold change=1.78, p=0.0003 q=0.0026) and vascular leptomeningeal cells (VLMC, Fold change=1.73, p=0.0006, q=0.0039) (Figure 6a, 6c). Interestingly, EWCE in SCZ.black and SCZ.greenyellow modules exhibited enrichment in these celltypes, as well (Figure 6a, 5c). We supposed that SCZ.yellowgreen module and OCD.green module, which reached their expression peak both in the late-pregnancy (26 -37 pcw), were in overlapped function. Therefore, we employed enrichment to determine the similarity and difference between this module pairs. Results suggested largely overlapped functional terms in several clusters between groups, including vascular and cardiovascular development, cell migration and adhesion, neurodevelopment and morphogenesis, as well as signaling pathways (Figure 6d, Table S24. The most highly enriched terms at this stage included Vasculature development (GO:0001944, SCZ: p=1.62e-14, q=3.98e-10; OCD: p=5.01e-5, q=0.005), Tube morphogenesis (GO:0035239, OCD: p=5.61e-8, q=3.16e-5; SCZ: p = 3.34e-13, q = 2.51e-9), and Focal adhesion (WP306, OCD: p = 8.73e-13, q = 3.98e-9; SCZ: p = 1.25e-8, q = 0.00001). Taken together, these results indicate activated functions related to the regulation of proliferation, growth, migration, adhesion of cells, and tissue development, particularly in endothelial cells and neurovascular systems. At this stage, overrepresentation analysis identified enrichment of NDD-related genes only in SCZ (OCD: p=0.019, q=0.112; SCZ: p=0.002, q=0.017) (Figure S8a, Table S25), suggesting that the potential role of this modular gene in neurodevelopmental disorders remains understudied.

There was also another paired modules implied shared mechanisms related to activation neuron celltypes, i.e. OCD.brown(n=203) module and SCZ.brown(n=203) module (Figure 6c). We observed significant enrichment neither of coding nor non-coding genesets in these modules (Figure 6b), which indicated the coordination between coding and non-coding variants in these modules and may imply the part of disease etiology driven by non-coding variants, other than the traditionally focused coding part. The most enriched terms in this phase include Inorganic ion transmembrane transport (GO:0098660, OCD: p=4.09e-12, q=1e-7; SCZ: p=4.92e-9, q=6.31e-6), ADHD and autism ASD linked metabolic pathways and SNP (WP5420, OCD: p=8.35e-11, q=3.98e-7; SCZ: p=4.92e-9, q=6.31e-6), modulation of chemical synaptic transmission(GO:0050804, OCD: p=6.79e-6, q=0.002; SCZ: p=6.33e-10, q=1.26e-6) (Figure 6e, Table S26). Over-representation analysis revealed that this module is enriched with numerous known risk gene sets for neurological and neurodevelopmental conditions, including hPSD (OCD: p=2.02e-6, q=3.19e-6; SCZ: p=1.66e-7, q=2.92e-7), NDD (OCD: p=0.059, q=0.041; SCZ: p=0.035, q=0.021), ASD (OCD: p=0.0004, q=0.0004; SCZ: p=6.52e-6, q=8.57e-6), and LOEUF_20% (OCD: p=0.023, q=0.021; SCZ: p=8.19e-5, q=7.19e-5) genes. Additionally, several transcriptional regulators, such as FMRP (OCD: p=2.28e-8, q=7.19e-8; SCZ: p=9.95e-11, q=2.62e-10), RBFOX (OCD: p=1.42e-6, q=3e-6; SCZ: p=4.62e-5, q=4.87e-5), and CELF4 (OCD: p=3.21e-5, q=4.06e-5; SCZ: p=0.0008, q=0.0005) target genes, were also enriched. These findings suggest that this module may play a key role in the known etiology of OCD and SCZ, with potential non-coding pathways contributing to the phenotypic effects. (Figure S8b, Table S27).

Compared with coding-variant-enriched modules in OCD, SCZ.black module manifested special trajectory and continuing high expression level after birth, indicating distinct expression patterns in SCZ etiology (Figure 6a). We made enrichment analysis on this module, and the result suggested enrollment in multifactorial cellular functions, including signaling pathways and ion regulation, transport and metabolism, development and morphogenesis, cellular responses and differentiation. The most highly enriched terms at this stage include Calcium signaling pathway (hsa04020, p=1.144e-7, q=0.002), Glomerulus development (GO:0032835, p=2.210e-7, q= 0.002), RHOa GTPase cycle (R-HSA-8980692, 1.100e-6, q=0.005) (Table S28). The enriched celltypes including astrocyte and pericyte (Figure 6f, Table S23). No geneset were enriched in overrepresentation analysis (Figure S8c, Table S29).

As the modules highly expressed in the early-pregnancy and mid-pregnancy were in lack of celltype expression specificity, we analyzed them according to the expression stage when they reached the expression peak. The paired analyses according to developmental stages revealed developmental divergence. Analysis in the early-pregnancy modules including SCZ.pink(n=61), SCZ.turquoise(n=339), SCZ.tan(n=42) and SCZ.yellow(n=98) modules, as well as OCD.pink(n=46), OCD.turquoise(n=409) and OCD.yellow (n=130) modules, separately. Enrichment analysis was made on the module pairs, exhibiting largely overlapped terms between OCD and SCZ (Figure 6d, Table S30). The top enriched terms were cell cycle (R-HSA-1640170, OCD: p=2.75e-14, q=2.51e-10; SCZ: p=3.37e-10, q=2.51e-7), DNA damage response (GO:0006974, OCD: p=3.06e-13, q=7.94e-10; SCZ: p=2.37e-13, q=6.31e-10) and Metabolism of RNA (R-HSA-8953854, OCD: p=5.89e-16, q=10e-10; SCZ: 1.39e-13, 5.01 e-10) (Figure 6g, Table S30), which implicating the active cell reproduction process during this period. Overrepresentation analysis highlighted the enrichment of CHD8 target genes (OCD: p=2.04e-18, q=2.85e-27; SCZ: p=1.01e-26, q=1.41e-25) and LOEUF_TOP20% (OCD: p=8.49e-6, q=5.94e-5; SCZ: p=0.003 , q=0.014) genes in both groups, while chromatin modification-related genes were slightly enriched in OCD(p=0.002, q=0.005) (Figure S8d, Table S31).

The mid-pregnancy modules including SCZ.green(n=91) and SCZ.blue (n=218) modules, as well as OCD.blue(n=207) and OCD.black(n=59) modules (Figure 6h). EWCE suggested the trends of enrichment in large variety of celltypes, indicating wide range development of brain cells in this stage (Table S20-S21). The most highly enriched terms were Chromatin organization (GO:0006325, OCD: p=1.43e-9, q=0.00001; SCZ: p=8.89e-6, q=0.00631), Regulation of cell projection organization (GO:0031344, OCD: p=0.0008, q=0.079; SCZ: p=4.56e-10, q=0.00001), and mRNA metabolic process (GO:0016071, OCD: p=1.14e-7, q=0.0003, SCZ: p=0.0004, q=0.050). The enriched terms and celltype suggesting that the exuberant transcriptional activity in this period associating with the development of neural system (Figure 6e, Table S32). Overrepresentation analyses revealed the involvement of various known neurodevelopment-related risk genes and transcriptional regulatory genes during this stage, including LOEUF_TOP20% (OCD: p=1.14e-10, q=7.17e-10; SCZ: p=2.74e-9, q=8.65e-9), ASD genes (OCD: p=0.006, q=0.007; SCZ: p=2.21e-6, q=4.65e-6), and the epigenetic regulator FMRP (OCD: p=0.002, q=0.004; SCZ: p=3.19e-10, q=2.01e-9), CHD8 (OCD: p=0.006, q=0.007; SCZ: p=0.010, q=0.003) target genes, chromatin modification related genes (OCD: p=0.002, q=0.005; SCZ: p=0.001, q=0.002) were involved during this stage (Figure S8e, Table S33).
